# Supplementary material for: Investigating the synergistic potential Si and biochar to immobilize soil Ni in a contaminated calcareous soil after Zea mays L. cultivation
Source: Copernicus journal article supplement (doi:10.5194/egusphere-2023-2687), 2024-01-12
Supplement: Supplementary file [file egusphere-2023-2687-AC2-supplement.zip]

## supplementary information

Effects of biochars and Si application rates on the soil pH after corn cultivation.

|                | C       | SM300   | SM500   | RH300   | RH500   |        |
|----------------|---------|---------|---------|---------|---------|--------|
| S <sub>0</sub> | 7.69 j  | 7.88 i  | 7.96 gh | 7.73 j  | 7.84 i  | 7.82 C |
| S <sub>1</sub> | 8.07 de | 7.99 fg | 8.13 cd | 7.90 hi | 8.04 ef | 8.02 B |
| S <sub>2</sub> | 8.28 a  | 8.17 bc | 8.22 ab | 8.05 ef | 8.16 bc | 8.18 A |
| Mean           | 8.01 B  | 8.01 B  | 8.10 A  | 7.89 C  | 8.01 B  |        |

Notes: C, control; SM300, sheep manure biochar generated at 300 °C; SM500, sheep manure biochar generated at 500 °C; RH300, rice husk biochar produced at 300 °C; RH500, rice husk biochar produced at 500 °C; S<sub>0</sub>, without Si application; S<sub>1</sub>, addition of 250 mg Si kg<sup>-1</sup> soil; S<sub>2</sub>, addition of 500 mg Si kg<sup>-1</sup> soil. Numbers followed by same letters in each section, are not significantly (P<0.05) different.
